# Supplementary material
Source: PubMed Central journal article supplement (PMC3811525)
Supplement: AEM.01777-13_zam999104845so1.pdf [file AEM.01777-13_zam999104845so1.pdf]

1 **Supplemental Figure 1.** PCR identification of *B. animalis* subsp. *lactis* ATCC 25527  
2 using subspecies specific primers Bflact2/5.

3 **Supplemental Figure 1 Legend.** M- 100 bp ladder; Lane 1- DSM 10140 DNA +  
4 Bflact2/5; Lane 2- ATCC 27673 DNA + Bflact2/5; Lane 3- ATCC 25527 DNA +  
5 Bflact2/5; Lane 4- DSM 10140 DNA + Ban2/23Si; Lane 5- ATCC 27673 DNA +  
6 Ban2/23Si; Lane 6- ATCC 25527 DNA + Ban2/23Si; Lane 7- Negative Control

7

8 **Supplemental Figure 2.** *In silico* *KpnI* optical maps of three *B. animalis* strains

9 **Supplemental Figure 2 Legend.** *In silico* comparison of BI-04 (*B. animalis* subsp.  
10 *lactis*), ATCC 27673 (*B. animalis* subsp. *lactis*), and ATCC 25527 (*B. animalis* subsp.  
11 *animalis*).

12

13 **Supplemental Figure 3** Additional Genomic Islands present in *B. animalis* subsp. *lactis*  
14 ATCC 27673

15 **Supplemental Figure 3 Legend.** Genomic islands identified in *B. animalis* subsp. *lactis*  
16 ATCC 27673 compared to in *B. animalis* subsp. *lactis* BI-04, A. Genomic Island 1, B.  
17 Genomic Island 2, and C. Genomic Island 4. Green arrow correspond to mobile genetic  
18 elements, and white to hypothetical or not-specified genes. Aligned genes from BI-04  
19 (top) and ATCC 27673 (bottom) represent gene homology flanking Genomic Island.

20

21 **Supplemental Figure 1**

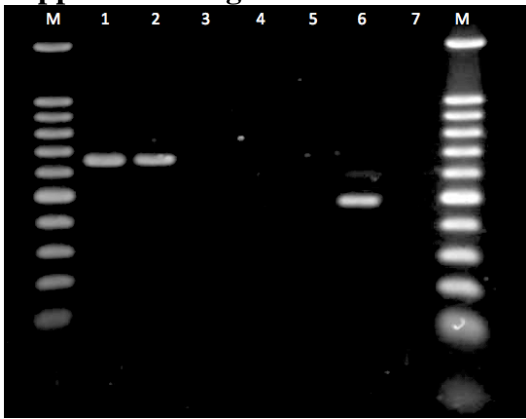

22  
23

24 **Supplemental Figure 2**

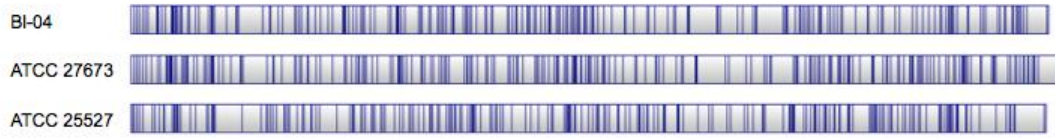

25  
26

27 **Supplemental Figure 3**

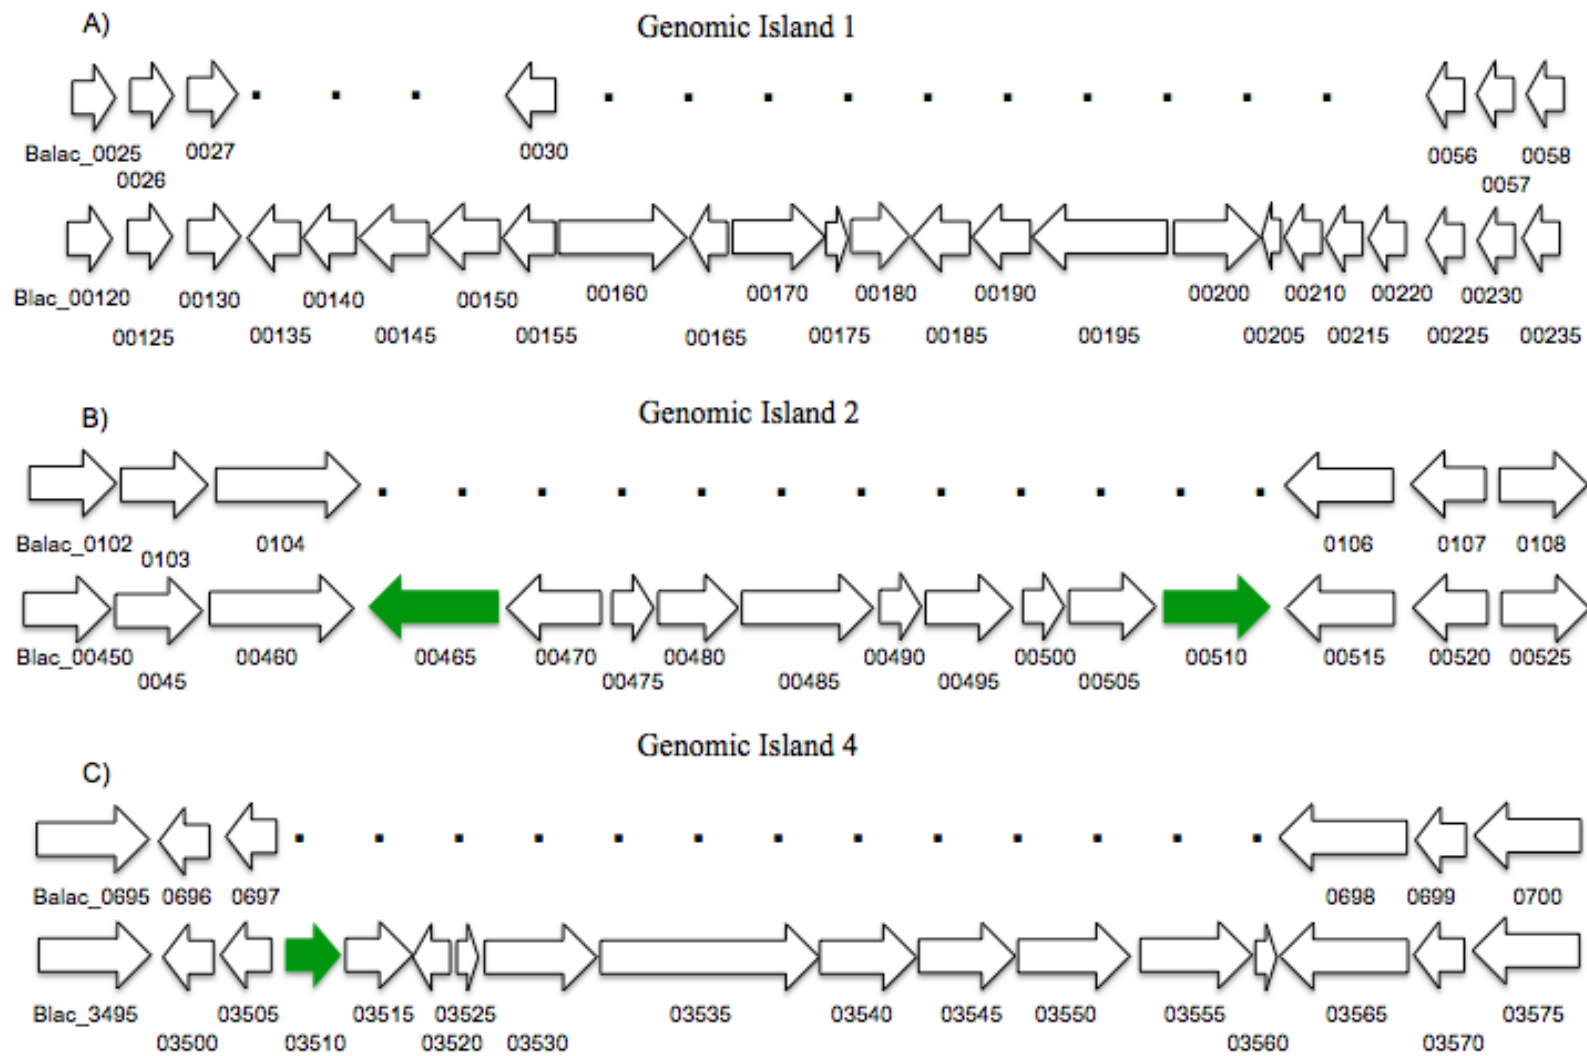

30 **Supplemental Table 1:** Unique genes in *B. animalis* subsp. *lactis* ATCC 27673

| <b>BLAC_Number</b> | <b>Amino Acid Length</b> | <b>Putative Gene Product</b>                                  | <b>BLAC_Number</b> | <b>Amino Acid Length</b> | <b>Putative Gene Product</b>                                                               |
|--------------------|--------------------------|---------------------------------------------------------------|--------------------|--------------------------|--------------------------------------------------------------------------------------------|
| <b>Island 1</b>    |                          |                                                               | <b>Island 5</b>    |                          |                                                                                            |
| BLAC_00135         | 134                      | Histone acetyltransferase HPA2 and related acetyltransferases | BLAC_05725         | 593                      | Site-specific recombinases, DNA invertase                                                  |
| BLAC_00140         | 134                      | hypothetical protein                                          | BLAC_05730         | 148                      | hypothetical protein                                                                       |
| BLAC_00145         | 236                      | hypothetical protein                                          | BLAC_05735         | 768                      | hypothetical protein                                                                       |
| BLAC_00150         | 262                      | hypothetical protein                                          | BLAC_05740         | 77                       | hypothetical protein                                                                       |
| BLAC_00160         | 681                      | Uncharacterized conserved protein                             | BLAC_05745         | 186                      | atpase chromosome partitioning protein ParA                                                |
| BLAC_00165         | 101                      | hypothetical protein                                          | BLAC_05750         | 118                      | cAMP-binding domain-catabolite gene activator                                              |
| BLAC_00170         | 402                      | hypothetical protein                                          | BLAC_05755         | 93                       | hypothetical protein                                                                       |
| BLAC_00175         | 83                       | hypothetical protein                                          | BLAC_05760         | 509                      | mobilization protein                                                                       |
| BLAC_00180         | 188                      | hypothetical protein                                          | BLAC_05765         | 173                      | mobilization protein                                                                       |
| BLAC_00185         | 212                      | hypothetical protein                                          | BLAC_05770         | 102                      | hypothetical protein                                                                       |
| BLAC_00190         | 191                      | hypothetical protein                                          | BLAC_05775         | 622                      | hypothetical protein                                                                       |
| BLAC_00195         | 702                      | hypothetical protein                                          | BLAC_05780         | 74                       | transcriptional regulator                                                                  |
| BLAC_00200         | 437                      | hypothetical protein                                          | BLAC_05990         | 32                       | hypothetical protein                                                                       |
| BLAC_00205         | 62                       | hypothetical protein                                          | BLAC_06025         | 533                      | Oligopeptide ABC transporter, periplasmic oligopeptide-binding protein OppA (TC 3.A.1.5.1) |
| BLAC_00210         | 101                      | hypothetical protein                                          | BLAC_06485         | 97                       | hypothetical protein                                                                       |
| BLAC_00215         | 94                       | hypothetical protein                                          | BLAC_06490         | 87                       | hypothetical protein                                                                       |

|                 |     |                                               |                 |     |                                            |
|-----------------|-----|-----------------------------------------------|-----------------|-----|--------------------------------------------|
| BLAC_00220      | 157 | hypothetical protein                          | BLAC_06495      | 279 | Protein tyrosine phosphatase (EC 3.1.3.48) |
| BLAC_00335      | 63  | hypothetical protein                          | BLAC_06500      | 268 | hypothetical protein                       |
| <b>Island 2</b> |     |                                               | BLAC_06505      | 90  | hypothetical protein                       |
| BLAC_00465      | 382 | phage integrase                               | BLAC_06525      | 200 | Transcriptional regulator, MarR family     |
| BLAC_00470      | 251 | hypothetical protein                          | BLAC_06535      | 130 | Alcohol dehydrogenase (EC 1.1.1.1)         |
| BLAC_00475      | 98  | hypothetical protein                          | BLAC_06540      | 63  | hypothetical protein                       |
| BLAC_00480      | 130 | hypothetical protein                          | BLAC_06650      | 155 | hypothetical protein                       |
| BLAC_00485      | 429 | hypothetical protein                          | BLAC_06760      | 76  | hypothetical protein                       |
| BLAC_00490      | 89  | hypothetical protein                          | BLAC_06940      | 311 | hypothetical protein                       |
| BLAC_00495      | 208 | hypothetical protein                          | <b>Island 6</b> |     |                                            |
| BLAC_00500      | 62  | hypothetical protein                          | BLAC_07020      | 107 | IS3 family transposase                     |
| BLAC_00505      | 220 | hypothetical protein                          | BLAC_07025      | 311 | transposase subunit B                      |
| BLAC_00510      | 289 | phage major capsid protein, HK97              | BLAC_07030      | 635 | hypothetical protein                       |
| BLAC_00690      | 70  | hypothetical protein                          | BLAC_07035      | 268 | hypothetical protein                       |
| BLAC_00695      | 471 | hypothetical protein                          | BLAC_07040      | 63  | hypothetical protein                       |
| BLAC_00700      | 711 | hypothetical protein                          | BLAC_07045      | 140 | hypothetical protein                       |
| BLAC_00705      | 45  | hypothetical protein                          | BLAC_07050      | 276 | hypothetical protein                       |
| BLAC_00725      | 145 | hypothetical protein                          | BLAC_07055      | 307 | hypothetical protein                       |
| <b>Island 3</b> |     |                                               | BLAC_07060      | 439 | transposase                                |
| BLAC_00780      | 463 | sugar ABC transport permease- binding protein | BLAC_07065      | 428 | transposase                                |
| BLAC_00785      | 461 | sugar ABC transport permease- binding protein | BLAC_07070      | 281 | glycosyl transferase family protein        |
| BLAC_00790      | 356 | sugar ABC transport                           | BLAC_07075      | 462 | glycosyl transferase, group                |

|                 |     |                                                                                         |            |     |                                         |
|-----------------|-----|-----------------------------------------------------------------------------------------|------------|-----|-----------------------------------------|
| BLAC_00795      | 313 | permease<br>binding protein dependent<br>transport systems- inner<br>membrane component | BLAC_07080 | 414 | 1<br>glycosyltransferase                |
| BLAC_2100       | 30  | hypothetical protein                                                                    | BLAC_07085 | 433 | O-antigen polymerase<br>(wzy)           |
| BLAC_2265       | 70  | hypothetical protein                                                                    | BLAC_07090 | 867 | endo-1,4-beta-xylanase                  |
| BLAC_2400       | 111 | hypothetical protein                                                                    | BLAC_07095 | 107 | IS3 family transposase                  |
| BLAC_2880       | 76  | hypothetical protein                                                                    | BLAC_07100 | 311 | transposase subunit B                   |
| BLAC_2885       | 48  | hypothetical protein                                                                    | BLAC_07105 | 150 | hypothetical protein                    |
| BLAC_2900       | 141 | Predicted acetyltransferase                                                             | BLAC_07110 | 329 | RelA/SpoT domain-<br>containing protein |
| BLAC_2910       | 491 | Type II restriction<br>endonuclease, MutH family                                        | BLAC_07120 | 74  | hypothetical protein                    |
| BLAC_2915       | 435 | DNA-cytosine<br>methyltransferase (EC<br>2.1.1.37)                                      | BLAC_07125 | 120 | CRISPR-associated protein,<br>Cas2      |
| BLAC_2920       | 257 | possible restriction<br>endonuclease                                                    | BLAC_07130 | 110 | CRISPR-associated protein<br>Cas1       |
| <b>Island 4</b> |     |                                                                                         | BLAC_07135 | 235 | CRISPR-associated protein,<br>Cas6e     |
| BLAC_03510      | 237 | phage integrase                                                                         | BLAC_07140 | 244 | CRISPR-associated protein,<br>Cas5      |
| BLAC_03515      | 300 | hypothetical protein                                                                    | BLAC_07145 | 338 | CRISPR-associated protein,<br>Cas7      |
| BLAC_03520      | 149 | hypothetical protein                                                                    | BLAC_07150 | 209 | CRISPR-associated protein,<br>Cse2      |
| BLAC_03525      | 71  | hypothetical protein                                                                    | BLAC_07155 | 581 | CRISPR-associated protein<br>Cse1       |

|            |      |                                                         |            |      |                                              |
|------------|------|---------------------------------------------------------|------------|------|----------------------------------------------|
| BLAC_03530 | 695  | type II restriction endonuclease                        | BLAC_07160 | 61   | hypothetical protein                         |
| BLAC_03535 | 1128 | hypothetical protein                                    | BLAC_07165 | 1035 | CRISPR-associated helicase Cas3              |
| BLAC_03540 | 438  | hypothetical protein                                    | BLAC_07450 | 519  | possible cell surface protein                |
| BLAC_03545 | 404  | hypothetical protein                                    | BLAC_07455 | 853  | hypothetical protein                         |
| BLAC_03550 | 648  | helicase domain-containing protein                      | BLAC_07590 | 141  | hypothetical protein                         |
| BLAC_03555 | 568  | hypothetical protein                                    | BLAC_07995 | 462  | Pyridine nucleotide-disulfide oxidoreductase |
| BLAC_03560 | 86   | hypothetical protein                                    |            |      |                                              |
| BLAC_03730 | 189  | hypothetical protein                                    |            |      |                                              |
| BLAC_03745 | 34   | RNA binding methyltransferase FtsJ like                 |            |      |                                              |
| BLAC_04005 | 233  | hypothetical protein                                    |            |      |                                              |
| BLAC_04010 | 274  | xylose isomerase                                        |            |      |                                              |
| BLAC_04125 | 109  | Transposase                                             |            |      |                                              |
| BLAC_04130 | 288  | hypothetical protein                                    |            |      |                                              |
| BLAC_04135 | 265  | Putative helicase                                       |            |      |                                              |
| BLAC_04145 | 69   | hypothetical protein                                    |            |      |                                              |
| BLAC_05220 | 79   | hypothetical protein                                    |            |      |                                              |
| BLAC_05665 | 419  | ABC-type multidrug transport system, permease component |            |      |                                              |

31  
32



33 **Supplemental Table 2:** Unique genes in *B. animalis* subsp. *lactis* Bl-04

| BALAC_Number    | Amino Acid Length | Putative Gene Product                        | BALAC_Number    | Amino Acid Length | Putative Gene Product                                                |
|-----------------|-------------------|----------------------------------------------|-----------------|-------------------|----------------------------------------------------------------------|
| Balac_0011      | 441               | multidrug transport protein                  | <b>Island 3</b> |                   |                                                                      |
| <b>Island 1</b> |                   |                                              | Balac_1179      | 367               | Integrase                                                            |
| Balac_0028      | 92                | hypothetical protein                         | Balac_1180      | 206               | hypothetical protein                                                 |
| Balac_0029      | 90                | hypothetical protein                         | Balac_1181      | 69                | hypothetical protein                                                 |
| Balac_0030      | 117               | hypothetical protein                         | Balac_1182      | 71                | hypothetical protein                                                 |
| Balac_0031      | 361               | hypothetical protein                         | Balac_1183      | 79                | hypothetical protein                                                 |
| Balac_0032      | 70                | hypothetical protein                         | Balac_1184      | 64                | hypothetical protein                                                 |
| Balac_0033      | 454               | DNA-cytosine methyltransferase (EC 2.1.1.37) | Balac_1185      | 64                | hypothetical protein                                                 |
| Balac_0034      | 282               | hypothetical protein                         | Balac_1186      | 401               | hypothetical protein                                                 |
| Balac_0035      | 808               | hypothetical protein                         | Balac_1187      | 91                | hypothetical protein                                                 |
| Balac_0036      | 194               | hypothetical protein                         | Balac_1188      | 63                | hypothetical protein                                                 |
| Balac_0037      | 712               | hypothetical protein                         | Balac_1189      | 79                | hypothetical protein                                                 |
| Balac_0038      | 123               | hypothetical protein                         | Balac_1190      | 106               | hypothetical protein                                                 |
| Balac_0039      | 38                | hypothetical protein                         | Balac_1191      | 588               | Putative phage prohead protease                                      |
| Balac_0040      | 68                | hypothetical protein                         | Balac_1192      | 74                | hypothetical protein                                                 |
| Balac_0041      | 77                | hypothetical protein                         | Balac_1204      | 599               | Cell division protein FtsI [Peptidoglycan synthetase] (EC 2.4.1.129) |
| Balac_0042      | 50                | hypothetical protein                         | Balac_1258      | 494               | phosphotransferase                                                   |
| Balac_0043      | 87                | hypothetical protein                         | Balac_1285      | 73                | hypothetical protein                                                 |

|                        |      |                                                                        |                 |      |                                                                                  |
|------------------------|------|------------------------------------------------------------------------|-----------------|------|----------------------------------------------------------------------------------|
| Balac_0044             | 128  | transcriptional modulator of MazE/toxin, MazF                          | Balac_1292      | 56   | hypothetical protein                                                             |
| Balac_0045             | 297  | Transcriptional regulator                                              | Balac_1293      | 257  | protein tyrosine/serine phosphatase                                              |
| Balac_0046             | 88   | Aldo/keto reductase of diketogulonate reductase family( EC:1.1.1.274 ) | Balac_1294      | 97   | hypothetical protein                                                             |
| Balac_0047             | 217  | oxidoreductase, aldo/keto reductase family                             | Balac_1298      | 184  | possible MarR-type transcriptional regulator                                     |
| Balac_0048             | 750  | Beta-glucosidase (EC 3.2.1.21)                                         | <b>Island 4</b> |      |                                                                                  |
| Balac_0049             | 146  | hypothetical protein                                                   | Balac_1301      | 63   | hypothetical protein                                                             |
| Balac_0052             | 509  | lysosomal glucosyl ceramidase-like protein                             | Balac_1302      | 87   | hypothetical protein                                                             |
| Balac_0053             | 702  | Beta-galactosidase (EC 3.2.1.23)                                       | Balac_1303      | 349  | CRISPR-associated Csb3                                                           |
| Balac_0054             | 385  | Glycoside-Pentoside-Hexuronide (GPH):Cation symporter family protein   | Balac_1304      | 1018 | CRISPR-associated Cas3                                                           |
| Balac_0055             | 214  | Transcriptional regulator, TetR family                                 | Balac_1305      | 546  | CRISPR-associated Csb2                                                           |
| Balac_0122             | 250  | Transcriptional regulator, MerR family                                 | Balac_1306      | 398  | CRISPR-associated Csb1                                                           |
| Balac_0177             | 733  | hypothetical protein                                                   | Balac_1307      | 98   | CRISPR-associated Cas2                                                           |
| Balac_0261/ <i>fbp</i> | 2697 | hypothetical protein                                                   | Balac_1308      | 497  | CRISPR-associated RecB family exonuclease Cas4b / CRISPR-associated protein Cas1 |

|                         |      |                                                            |                 |      |                                                     |
|-------------------------|------|------------------------------------------------------------|-----------------|------|-----------------------------------------------------|
| Balac_0262              | 42   | ATP-dependent DNA helicase RecG (EC 3.6.1.-)               | Balac_1329      | 299  | Dihydrodipicolinate synthase (EC 4.2.1.52)          |
| Balac_0299              | 314  | putative membrane protein                                  | Balac_1333      | 1518 | ATP-dependent DNA helicase                          |
| Balac_0435              | 66   | O-acetylhomoserine sulfhydrylase (EC 2.5.1.49)             | Balac_1350      | 31   | hypothetical protein                                |
| Balac_0447              | 709  | putative 67 kDa myosin-crossreactive streptococcal antigen | Balac_1371      | 537  | UDP-phosphate sugar phosphotransferase (EC 2.7.8.6) |
| Balac_0460              | 337  | UDP-glucose 4-epimerase (EC 5.1.3.2)                       | Balac_1387      | 311  | polysaccharide biosynthesis protein                 |
| Balac_0472              | 1166 | hypothetical protein                                       | <b>Island 5</b> |      |                                                     |
| Balac_0476/ <i>lacZ</i> | 1068 | Beta-galactosidase (EC 3.2.1.23)                           | Balac_1389      | 445  | flippase wzx                                        |
| Balac_0481              | 58   | hypothetical protein                                       | Balac_1390      | 335  | hypothetical protein                                |
| Balac_0502              | 303  | hypothetical protein                                       | Balac_1391      | 288  | Group 2 family glycosyl transferase                 |
| Balac_0518              | 642  | Sialic acid-specific 9-O-acetylerase                       | Balac_1399      | 379  | dTDP-glucose 4,6-dehydratase (EC 4.2.1.46)          |
| Balac_0537              | 268  | Methionine aminopeptidase (EC 3.4.11.18)                   | Balac_1400      | 155  | polysaccharide biosynthesis protein CpsF            |
| Balac_0547              | 80   | hypothetical protein                                       | Balac_1401      | 167  | Beta-1,4-galactosyltransferase CpsIVG               |
| Balac_0565              | 653  | ATP-dependent DNA helicase RecQ                            | Balac_1402      | 318  | Glycosyl transferase                                |

|                         |      |                                                                                                                                |                 |      |                                                                                                  |
|-------------------------|------|--------------------------------------------------------------------------------------------------------------------------------|-----------------|------|--------------------------------------------------------------------------------------------------|
| Balac_0572              | 128  | hypothetical protein                                                                                                           | Balac_1403      | 279  | Glycosyl transferase                                                                             |
| Balac_0574              | 1042 | DNA/RNA helicase of DEAD/DEAH box family                                                                                       | Balac_1404      | 378  | hypothetical protein                                                                             |
| Balac_0575              | 119  | hypothetical protein                                                                                                           | Balac_1405      | 1194 | multidrug ABC transporter ATPase and permease                                                    |
| Balac_0576              | 656  | hypothetical protein                                                                                                           | Balac_1412      | 112  | hypothetical protein                                                                             |
| Balac_0603              | 59   | hypothetical protein                                                                                                           | <b>Island 6</b> |      |                                                                                                  |
| Balac_0616              | 45   | hypothetical protein                                                                                                           | Balac_1440      | 373  | hypothetical protein                                                                             |
| Balac_0713              | 446  | ABC transporter, permease protein                                                                                              | Balac_1441      | 62   | hypothetical protein                                                                             |
| Balac_0744/ <i>glmU</i> | 461  | N-acetylglucosamine-1-phosphate uridylyltransferase (EC 2.7.7.23) / Glucosamine-1-phosphate N-acetyltransferase (EC 2.3.1.157) | Balac_1442      | 132  | hypothetical protein                                                                             |
| Balac_0767              | 505  | hypothetical protein                                                                                                           | Balac_1443      | 254  | putative plasmid transfer protein                                                                |
| Balac_0779              | 190  | hypothetical protein                                                                                                           | Balac_1444      | 306  | replication initiation protein                                                                   |
| Balac_0813              | 97   | hypothetical protein                                                                                                           | Balac_1445      | 76   | hypothetical protein                                                                             |
| Balac_0821              | 208  | Holliday junction DNA helicase RuvA                                                                                            | Balac_1446      | 373  | HNH endonuclease                                                                                 |
| <b>Island 2</b>         |      |                                                                                                                                | Balac_1447      | 364  | modification methylase EcoRI (Adenine-specific methyltransferase EcoRI) (M.EcoRI)( EC:2.1.1.72 ) |

|            |     |                                                         |                         |     |                                                           |
|------------|-----|---------------------------------------------------------|-------------------------|-----|-----------------------------------------------------------|
| Balac_0924 | 327 | Pullulanase (EC 3.2.1.41)                               | Balac_1448              | 407 | phage integrase                                           |
| Balac_0925 | 57  | hypothetical protein                                    | Balac_1451              | 44  | hypothetical protein                                      |
| Balac_0927 | 230 | hypothetical protein                                    | Balac_1463              | 32  | hypothetical protein                                      |
| Balac_0928 | 401 | hypothetical protein                                    | Balac_1484/ <i>capB</i> | 561 | possible cell surface protein                             |
| Balac_0929 | 390 | hypothetical protein                                    | Balac_1485              | 672 | hypothetical protein                                      |
| Balac_0930 | 142 | hypothetical protein                                    | Balac_1510              | 36  | hypothetical protein                                      |
| Balac_0931 | 151 | hypothetical protein                                    | Balac_1517              | 536 | 1,4-beta-N-acetylmuramidase                               |
| Balac_0932 | 322 | hypothetical protein                                    | Balac_1519              | 186 | N-acetylmuramoyl-L-alanine amidase                        |
| Balac_0956 | 293 | ABC transporter, ATP-binding protein                    | Balac_1520              | 176 | Tpx-1 family protein                                      |
| Balac_1005 | 550 | DNA segregation ATPase galactoside O-acetyltransferase( | Balac_1521              | 234 | hypothetical protein                                      |
| Balac_1132 | 214 | EC:2.3.1.79,EC:2.3.1.18 )                               | Balac_1522              | 443 | hypothetical protein                                      |
|            |     |                                                         | Balac_1541              | 35  | hypothetical protein                                      |
|            |     |                                                         | Balac_1578              | 197 | hypothetical protein                                      |
|            |     |                                                         | Balac_1599              | 438 | Multiple sugar ABC transporter, substrate-binding protein |
|            |     |                                                         | Balac_1607              | 997 | cation-transporting ATPase PacL                           |

34  
35
